# Supplementary material for: Post-ejaculatory inhibition of female sexual drive via heterogeneous neuronal ensembles in the medial preoptic area
Source: eLife. 2025 Mar 5;12:RP91765. doi: 10.7554/eLife.91765 (PMC11882143; doi:10.7554/eLife.91765)
Supplement: Supplementary file 1. [file elife-91765-supp1.xlsx]

## Sheet: Table 1
Figure	variable	Type of Test	Detail	statistic description	statistic	p Value
Figure1G	Number_of_Isolation_zone_entry_per_10min	Repeated Measures ANOVA	across states	F(2.0,16.0)	10.8876	0.00103589
Figure1G	Number_of_Isolation_zone_entry_per_10min	Tukey HSD	Control vs Post_Ejaculation		-4.6093	0.0015
Figure1G	Number_of_Isolation_zone_entry_per_10min	Tukey HSD	Control vs Pre_Ejaculation		-1.0709	0.6284
Figure1G	Number_of_Isolation_zone_entry_per_10min	Tukey HSD	Post_Ejaculation vs Pre_Ejaculation		3.5384	0.0142
Figure1H	Duration_second	Repeated Measures ANOVA	across states	F(2.0,16.0)	14.3444	0.00027
Figure1H	Duration_second	Tukey HSD	Control vs Post_Ejaculation		342.016	0.0004
Figure1H	Duration_second	Tukey HSD	Control vs Pre_Ejaculation		81.4416	0.5361
Figure1H	Duration_second	Tukey HSD	Post_Ejaculation vs Pre_Ejaculation		-260.575	0.0057
Figure1I	Latency (s)	Repeated Measures ANOVA	across states	F(2.0,16.0)	11.8698	0.00069052
Figure1I	Latency (s)	Tukey HSD	Comparison Ejaculation_latency vs Interaction_latency		-333.11	0.0016
Figure1I	Latency (s)	Tukey HSD	Comparison Ejaculation_latency vs Mount_latency		-278.765	0.0077
Figure1I	Latency (s)	Tukey HSD	Comparison Interaction_latency vs Mount_latency		54.3454	0.7951
Figure1K	Number_of_Mounting_START_per_10min	Two-way Wilcoxon signed-rank test	Pre_Ejaculation vs Post_Ejaculation	W(n=9)	0	0.00390625
Figure1J	Number_of_Sniff_START_per_10min	Two-way Wilcoxon signed-rank test	Pre_Ejaculation vs Post_Ejaculation	W(n=9)	18	0.652344
Figure1L	Number_of_Intromission_START_per_10min	Two-way Wilcoxon signed-rank test	Pre_Ejaculation vs Post_Ejaculation	W(n=9)	0	0.00390625
Figure1M	Number_of_Grooming_START_per_10min	Two-way Wilcoxon signed-rank test	Pre_Ejaculation vs Post_Ejaculation	W(n=9)	2	0.0250618
Figure1N	transition_nper10min	Repeated Measures ANOVA	across states	F(2.0,10.0)	7.54154	0.0100715
Figure1N	transition_nper10min	Tukey HSD	Control vs Post_Ejaculation		-5.9444	0.0871
Figure1N	transition_nper10min	Tukey HSD	Control vs Pre_Ejaculation		4.1617	0.2727
Figure1N	transition_nper10min	Tukey HSD	Post_Ejaculation vs Pre_Ejaculation		10.1062	0.0038
Figure1O	ave_time_in_isolation_zone	Repeated Measures ANOVA	across states	F(2.0,10.0)	15.7136	0.000819535
Figure1O	ave_time_in_isolation_zone	Tukey HSD	Control vs Post_Ejaculation		439.622	0.0002
Figure1O	ave_time_in_isolation_zone	Tukey HSD	Control vs Pre_Ejaculation		12.7411	0.9862
Figure1O	ave_time_in_isolation_zone	Tukey HSD	Post_Ejaculation vs Pre_Ejaculation		-426.881	0.0002
Figure1P	Latency (s)	Repeated Measures ANOVA	across states	F(2.0,10.0)	38.3637	2.04e-05
Figure1P	Latency (s)	Tukey HSD	ejac_ave_latency vs interaction_ave_latency		-494.163	0
Figure1P	Latency (s)	Tukey HSD	ejac_ave_latency vs mount_ave_latency		-431.976	0
Figure1P	Latency (s)	Tukey HSD	interaction_ave_latency vs mount_ave_latency		62.1868	0.6201
Figure1Q	Sniffing_nper10min	Two-way Wilcoxon signed-rank test	Pre_Ejaculation vs Post_Ejaculation	W(n=6)	0	0.03125
Figure1R	Mounting_nper10min	Two-way Wilcoxon signed-rank test	Pre_Ejaculation vs Post_Ejaculation	W(n=6)	0	0.03125
Figure1S	Intromission_nper10min	Two-way Wilcoxon signed-rank test	Pre_Ejaculation vs Post_Ejaculation	W(n=6)	0	0.03125
Figure1T	Grooming_nper10min	Two-way Wilcoxon signed-rank test	Pre_Ejaculation vs Post_Ejaculation	W(n=6)	4	0.345231
Figure3H	Sniff_zscore_magnitude	t-test with BH correction	Vgat vs Vglut2	t(791)	6.46258	1.08e-09
Figure3H	Grooming_zscore_magnitude	t-test with BH correction	Vgat vs Vglut2	t(791)	-7.25156	5.89e-12
Figure3H	Male_anogenital_sniffing_zscore_magnitude	t-test with BH correction	Vgat vs Vglut2	t(791)	6.64368	3.41e-10
Figure3H	Mount_zscore_magnitude	t-test with BH correction	Vgat vs Vglut2	t(791)	0.337128	1
Figure3H	Intromission_zscore_magnitude	t-test with BH correction	Vgat vs Vglut2	t(791)	-0.319666	1
Figure3H	Ejaculation_zscore_magnitude	t-test with BH correction	Vgat vs Vglut2	t(791)	3.99782	0.000419471
Figure3I	Proportion of Sniff positive responding cells	chisquare test with BH correction	Vgat 29/522 cells vs Vglut2 1/271 cells	chi2stat	13.1833	0.00169472
Figure3I	Proportion of Grooming positive responding cells	chisquare test with BH correction	Vgat 2/522 cells vs Vglut2 0/271 cells	chi2stat	1.04094	1
Figure3I	Proportion of Male_anogenital_sniffing positive responding cells	chisquare test with BH correction	Vgat 9/522 cells vs Vglut2 0/271 cells	chi2stat	4.72605	0.178254
Figure3I	Proportion of Mount positive responding cells	chisquare test with BH correction	Vgat 58/522 cells vs Vglut2 22/271 cells	chi2stat	1.7618	1
Figure3I	Proportion of Intromission positive responding cells	chisquare test with BH correction	Vgat 57/522 cells vs Vglut2 26/271 cells	chi2stat	0.334426	1
Figure3I	Proportion of Ejaculation positive responding cells	chisquare test with BH correction	Vgat 184/522 cells vs Vglut2 35/271 cells	chi2stat	44.513	1.52e-10
Figure3I	Proportion of Sniff negative responding cells	chisquare test with BH correction	Vgat 0/522 cells vs Vglut2 0/271 cells	chi2stat
Figure3I	Proportion of Grooming negative responding cells	chisquare test with BH correction	Vgat 5/522 cells vs Vglut2 0/271 cells	chi2stat	2.61226	0.636245
Figure3I	Proportion of Male_anogenital_sniffing negative responding cells	chisquare test with BH correction	Vgat 0/522 cells vs Vglut2 0/271 cells	chi2stat
Figure3I	Proportion of Mount negative responding cells	chisquare test with BH correction	Vgat 7/522 cells vs Vglut2 3/271 cells	chi2stat	0.0784382	1
Figure3I	Proportion of Intromission negative responding cells	chisquare test with BH correction	Vgat 17/522 cells vs Vglut2 4/271 cells	chi2stat	2.19408	0.83125
Figure3I	Proportion of Ejaculation negative responding cells	chisquare test with BH correction	Vgat 33/522 cells vs Vglut2 17/271 cells	chi2stat	0.000718411	1
Figure4C	Sniff_zscore_magnitude	One-way ANOVA	across states	F(2.0,235.0)	73.3519	1.77e-25
Figure4C	Sniff_zscore_magnitude	Tukey HSD	Ejaculation_only_cells vs Mount_only_cells		0.0026	0.9996
Figure4C	Sniff_zscore_magnitude	Tukey HSD	Ejaculation_only_cells vs Sniff_only_cells		2.0478	0
Figure4C	Sniff_zscore_magnitude	Tukey HSD	Mount_only_cells vs Sniff_only_cells		2.0452	0
Figure4C	Grooming_zscore_magnitude	One-way ANOVA	across states	F(2.0,235.0)	0.088897	0.914971
Figure4C	Grooming_zscore_magnitude	Tukey HSD	Ejaculation_only_cells vs Mount_only_cells		-0.0184	0.9723
Figure4C	Grooming_zscore_magnitude	Tukey HSD	Ejaculation_only_cells vs Sniff_only_cells		-0.0567	0.9236
Figure4C	Grooming_zscore_magnitude	Tukey HSD	Mount_only_cells vs Sniff_only_cells		-0.0383	0.9695
Figure4C	Male_anogenital_sniffing_zscore_magnitude	One-way ANOVA	across states	F(2.0,235.0)	12.3402	8.01e-06
Figure4C	Male_anogenital_sniffing_zscore_magnitude	Tukey HSD	Ejaculation_only_cells vs Mount_only_cells		0.3766	0
Figure4C	Male_anogenital_sniffing_zscore_magnitude	Tukey HSD	Ejaculation_only_cells vs Sniff_only_cells		-0.1215	0.6794
Figure4C	Male_anogenital_sniffing_zscore_magnitude	Tukey HSD	Mount_only_cells vs Sniff_only_cells		-0.4981	0.0048
Figure4C	Mount_zscore_magnitude	One-way ANOVA	across states	F(2.0,235.0)	68.3151	4.1e-24
Figure4C	Mount_zscore_magnitude	Tukey HSD	Ejaculation_only_cells vs Mount_only_cells		3.273	0
Figure4C	Mount_zscore_magnitude	Tukey HSD	Ejaculation_only_cells vs Sniff_only_cells		-0.2586	0.8726
Figure4C	Mount_zscore_magnitude	Tukey HSD	Mount_only_cells vs Sniff_only_cells		-3.5316	0
Figure4C	Intromission_zscore_magnitude	One-way ANOVA	across states	F(2.0,235.0)	15.7237	3.9e-07
Figure4C	Intromission_zscore_magnitude	Tukey HSD	Ejaculation_only_cells vs Mount_only_cells		1.9366	0
Figure4C	Intromission_zscore_magnitude	Tukey HSD	Ejaculation_only_cells vs Sniff_only_cells		-0.6982	0.5451
Figure4C	Intromission_zscore_magnitude	Tukey HSD	Mount_only_cells vs Sniff_only_cells		-2.6347	0.0009
Figure4C	Ejaculation_zscore_magnitude	One-way ANOVA	across states	F(2.0,235.0)	49.5863	1.08e-18
Figure4C	Ejaculation_zscore_magnitude	Tukey HSD	Ejaculation_only_cells vs Mount_only_cells		-6.4196	0
Figure4C	Ejaculation_zscore_magnitude	Tukey HSD	Ejaculation_only_cells vs Sniff_only_cells		-5.3948	0.0001
Figure4C	Ejaculation_zscore_magnitude	Tukey HSD	Mount_only_cells vs Sniff_only_cells		1.0248	0.7295
Figure5C	Decay length (s)	Students t-test	Vgat vs Vglut2	t(217)	3.03965	0.00265955
Figure5F	Ejaculation	Tukey HSD	Type 1 vs Type 2		3.9941	0.9874
Figure5F	Ejaculation	Tukey HSD	Type 1 vs Type 3		63.9311	0
Figure5F	Ejaculation	Tukey HSD	Type 1 vs Type 4		13.2333	0.323
Figure5F	Ejaculation	Tukey HSD	Type 1 vs Type 5		-23.6152	0.0141
Figure5F	Ejaculation	Tukey HSD	Type 2 vs Type 3		59.937	0
Figure5F	Ejaculation	Tukey HSD	Type 2 vs Type 4		9.2392	0.7278
Figure5F	Ejaculation	Tukey HSD	Type 2 vs Type 5		-27.6093	0.0048
Figure5F	Ejaculation	Tukey HSD	Type 3 vs Type 4		-50.6977	0
Figure5F	Ejaculation	Tukey HSD	Type 3 vs Type 5		-87.5463	0
Figure5F	Ejaculation	Tukey HSD	Type 4 vs Type 5		-36.8486	0
Figure5G	Ejaculation	Tukey HSD	Type 1 vs Type 2		-7.081	0
Figure5G	Ejaculation	Tukey HSD	Type 1 vs Type 3		-8.3621	0
Figure5G	Ejaculation	Tukey HSD	Type 1 vs Type 4		-10.4675	0
Figure5G	Ejaculation	Tukey HSD	Type 1 vs Type 5		-8.4544	0
Figure5G	Ejaculation	Tukey HSD	Type 2 vs Type 3		-1.281	0.6717
Figure5G	Ejaculation	Tukey HSD	Type 2 vs Type 4		-3.3864	0.0012
Figure5G	Ejaculation	Tukey HSD	Type 2 vs Type 5		-1.3733	0.5638
Figure5G	Ejaculation	Tukey HSD	Type 3 vs Type 4		-2.1054	0.0972
Figure5G	Ejaculation	Tukey HSD	Type 3 vs Type 5		-0.0923	1
Figure5G	Ejaculation	Tukey HSD	Type 4 vs Type 5		2.0131	0.0863
Figure5K	Proportion of Type 1 responding cells	chisquare test with BH correction	Vgat 26/184 cells vs Vglut2 16/35 cells	chi2stat	18.9251	6.7977e-05
Figure5K	Proportion of Type 2 responding cells	chisquare test with BH correction	Vgat 33/184 cells vs Vglut2 1/35 cells	chi2stat	5.09737	0.119811
Figure5K	Proportion of Type 3 responding cells	chisquare test with BH correction	Vgat 37/184 cells vs Vglut2 0/35 cells	chi2stat	8.46885	0.0180639
Figure5K	Proportion of Type 4 responding cells	chisquare test with BH correction	Vgat 47/184 cells vs Vglut2 13/35 cells	chi2stat	1.98907	0.792188
Figure5K	Proportion of Type 5 responding cells	chisquare test with BH correction	Vgat 41/184 cells vs Vglut2 5/35 cells	chi2stat	1.13336	1
Figure6F	Number_of_zone_transition_per_10min	Two-way Wilcoxon signed-rank test	Post_ejaculatory_hM3Dq; Saline vs CNO	W(n=8)	0	0.03125
Figure6F	Number_of_zone_transition_per_10min	Two-way Wilcoxon signed-rank test	Post_ejaculatory_eYFP; Saline vs CNO	W(n=6)	6	1
Figure6F	Number_of_zone_transition_per_10min	Two-way Wilcoxon signed-rank test	Appetitive_hM3Dq; Saline vs CNO	W(n=7)	6	0.875
Figure6F	Number_of_zone_transition_per_10min	Two-way Wilcoxon signed-rank test	Consummatory_hM3Dq; Saline vs CNO	W(n=7)	0	0.0625
Figure6G	Duration_second	Two-way Wilcoxon signed-rank test	Post_ejaculatory_hM3Dq; Saline vs CNO	W(n=8)	0	0.03125
Figure6G	Duration_second	Two-way Wilcoxon signed-rank test	Post_ejaculatory_eYFP; Saline vs CNO	W(n=6)	5	1
Figure6G	Duration_second	Two-way Wilcoxon signed-rank test	Appetitive_hM3Dq; Saline vs CNO	W(n=7)	6	0.875
Figure6G	Duration_second	Two-way Wilcoxon signed-rank test	Consummatory_hM3Dq; Saline vs CNO	W(n=7)	1	0.125
Figure6H	Sniff_event	Two-way Wilcoxon signed-rank test	Post_ejaculatory_hM3Dq; Saline vs CNO	W(n=8)	1	0.111967
Figure6H	Sniff_event	Two-way Wilcoxon signed-rank test	Post_ejaculatory_eYFP; Saline vs CNO	W(n=6)	2	0.375
Figure6H	Sniff_event	Two-way Wilcoxon signed-rank test	Appetitive_hM3Dq; Saline vs CNO	W(n=7)	8.5	1
Figure6H	Sniff_event	Two-way Wilcoxon signed-rank test	Consummatory_hM3Dq; Saline vs CNO	W(n=7)	3	0.459398
Figure6I	Grooming_event	Two-way Wilcoxon signed-rank test	Post_ejaculatory_hM3Dq; Saline vs CNO	W(n=8)	1	0.0625
Figure6I	Grooming_event	Two-way Wilcoxon signed-rank test	Post_ejaculatory_eYFP; Saline vs CNO	W(n=6)	5	1
Figure6I	Grooming_event	Two-way Wilcoxon signed-rank test	Appetitive_hM3Dq; Saline vs CNO	W(n=7)	6.5	1
Figure6I	Grooming_event	Two-way Wilcoxon signed-rank test	Consummatory_hM3Dq; Saline vs CNO	W(n=7)	2	0.552043
Figure6J	Mount_event	Two-way Wilcoxon signed-rank test	Post_ejaculatory_hM3Dq; Saline vs CNO	W(n=8)	1	0.0625
Figure6J	Mount_event	Two-way Wilcoxon signed-rank test	Post_ejaculatory_eYFP; Saline vs CNO	W(n=6)	4	0.875
Figure6J	Mount_event	Two-way Wilcoxon signed-rank test	Appetitive_hM3Dq; Saline vs CNO	W(n=7)	11	1
Figure6J	Mount_event	Two-way Wilcoxon signed-rank test	Consummatory_hM3Dq; Saline vs CNO	W(n=7)	5	1
Figure6K	Intromission_event	Two-way Wilcoxon signed-rank test	Post_ejaculatory_hM3Dq; Saline vs CNO	W(n=8)	0	0.03125
Figure6K	Intromission_event	Two-way Wilcoxon signed-rank test	Post_ejaculatory_eYFP; Saline vs CNO	W(n=6)	3	0.625
Figure6K	Intromission_event	Two-way Wilcoxon signed-rank test	Appetitive_hM3Dq; Saline vs CNO	W(n=7)	10	1
Figure6K	Intromission_event	Two-way Wilcoxon signed-rank test	Consummatory_hM3Dq; Saline vs CNO	W(n=7)	0	0.271557
Figure6L	Receptive_score	Two-way Wilcoxon signed-rank test	Post_ejaculatory_hM3Dq; Saline vs CNO	W(n=8)	0	0.03125
Figure6L	Receptive_score	Two-way Wilcoxon signed-rank test	Post_ejaculatory_eYFP; Saline vs CNO	W(n=6)	5	1
Figure6L	Receptive_score	Two-way Wilcoxon signed-rank test	Appetitive_hM3Dq; Saline vs CNO	W(n=7)	5	0.625
Figure6L	Receptive_score	Two-way Wilcoxon signed-rank test	Consummatory_hM3Dq; Saline vs CNO	W(n=7)	0	0.271557
FigureS1A	Number_of_Isolation_zone_entry_per_10min	Mann-Whitney U rank test	Virgin vs SE	MW(n=6, 6)	5	0.0411255
FigureS1B	Time_in_Isolation_zone_per_10min	Mann-Whitney U rank test	Virgin vs SE	MW(n=6, 6)	32	0.025974
FigureS2B	Interaction_zone_entry	Two-way Wilcoxon signed-rank test	Pre_Ejaculation vs Post_Ejaculation	W(n=7)	0	0.0272812
FigureS2C	Isolation_zone_avetime	Two-way Wilcoxon signed-rank test	Pre_Ejaculation vs Post_Ejaculation	W(n=7)	0	0.0277078
FigureS9B	Total number of TRAP cells	One-way ANOVA	across states	F(2.0,24.0)	0.30723	0.738331
FigureS9B	Total number of TRAP cells	Tukey HSD	Appetitive vs Consummatory	meandiff	112.486	0.9184
FigureS9B	Total number of TRAP cells	Tukey HSD	Appetitive vs Post_ejaculatory	meandiff	174.952	0.7166
FigureS9B	Total number of TRAP cells	Tukey HSD	Consummatory vs Post_ejaculatory	meandiff	62.4667	0.9667
FigureS9C	Proportion_of_TRAP_cells_in_MPN	One-way ANOVA	across states	F(2.0,24.0)	4.33347	0.0247305
FigureS9C	Total number of TRAP cells	Tukey HSD	Appetitive vs Consummatory	meandiff	0.0048	0.9975
FigureS9C	Total number of TRAP cells	Tukey HSD	Appetitive vs Post_ejaculatory	meandiff	0.1422	0.0471
FigureS9C	Total number of TRAP cells	Tukey HSD	Consummatory vs Post_ejaculatory	meandiff	0.1374	0.0984
FigureS9E	Vgat_TRAP_cells	Students t-test	Appetitive vs Post_ejaculatory	t(11)	-1.32988	0.210474
FigureS9F	Vglut2_TRAP_cells	Students t-test	Appetitive vs Post_ejaculatory	t(11)	-0.791695	0.445275
FigureS9G	Proportion of TRAP cells	Students relative t-test	Appetitive; Vgat vs Vglut2	t(10)	6.61544	0.00237514
FigureS9G	Proportion of TRAP cells	Students relative t-test	Post_ejaculatory; Vgat vs Vglut2	t(12)	13.9477	1.69e-05
FigureS9I	Total number of TRAP cells	One-way ANOVA	across states	F(2.0,17.0)	3.25692	0.0634698
FigureS9I	Total number of TRAP cells	Tukey HSD	Appetitive vs Consummatory	meandiff	-0.0003	0.9991
FigureS9I	Total number of TRAP cells	Tukey HSD	Appetitive vs Post_ejaculatory	meandiff	0.0128	0.0942
FigureS9I	Total number of TRAP cells	Tukey HSD	Consummatory vs Post_ejaculatory	meandiff	0.0131	0.1268
FigureS9J	Total number of TRAP cells	One-way ANOVA	across states	F(2.0,17.0)	3.12852	0.0696791
FigureS9J	Total number of TRAP cells	Tukey HSD	Appetitive vs Consummatory	meandiff	-0.0427	0.1724
FigureS9J	Total number of TRAP cells	Tukey HSD	Appetitive vs Post_ejaculatory	meandiff	0.0111	0.8445
FigureS9J	Total number of TRAP cells	Tukey HSD	Consummatory vs Post_ejaculatory	meandiff	0.0538	0.0631
FigureS9K	Total number of TRAP cells	One-way ANOVA	across states	F(2.0,17.0)	0.466618	0.634917
FigureS9K	Total number of TRAP cells	Tukey HSD	Appetitive vs Consummatory	meandiff	-0.1134	0.6234
FigureS9K	Total number of TRAP cells	Tukey HSD	Appetitive vs Post_ejaculatory	meandiff	-0.0683	0.8001
FigureS9K	Total number of TRAP cells	Tukey HSD	Consummatory vs Post_ejaculatory	meandiff	0.0451	0.9224
FigureS9L	Total number of TRAP cells	One-way ANOVA	across states	F(2.0,17.0)	2.8313	0.0868323
FigureS9L	Total number of TRAP cells	Tukey HSD	Appetitive vs Consummatory	meandiff	0.018	0.9028
FigureS9L	Total number of TRAP cells	Tukey HSD	Appetitive vs Post_ejaculatory	meandiff	0.0836	0.0882
FigureS9L	Total number of TRAP cells	Tukey HSD	Consummatory vs Post_ejaculatory	meandiff	0.0656	0.2666
FigureS10C	Sniff_event	Mann-Whitney U rank test	Post_ejaculatory_eYFP vs Appetitive_hM3Dq	MW(n=6, 7)	22	1
FigureS10C	Sniff_event	Mann-Whitney U rank test	Post_ejaculatory_eYFP vs Consummatory_hM3Dq	MW(n=6, 7)	33.5	0.258132
FigureS10C	Sniff_event	Mann-Whitney U rank test	Post_ejaculatory_eYFP vs Post_ejaculatory_hM3Dq	MW(n=6, 8)	48	0.00716417
FigureS10D	Mount_event	Mann-Whitney U rank test	Post_ejaculatory_eYFP vs Appetitive_hM3Dq	MW(n=6, 7)	21	1
FigureS10D	Mount_event	Mann-Whitney U rank test	Post_ejaculatory_eYFP vs Consummatory_hM3Dq	MW(n=6, 7)	24	1
FigureS10D	Mount_event	Mann-Whitney U rank test	Post_ejaculatory_eYFP vs Post_ejaculatory_hM3Dq	MW(n=6, 8)	36	0.411617
FigureS10E	Intromission_event	Mann-Whitney U rank test	Post_ejaculatory_eYFP vs Appetitive_hM3Dq	MW(n=6, 7)	18.5	1
FigureS10E	Intromission_event	Mann-Whitney U rank test	Post_ejaculatory_eYFP vs Consummatory_hM3Dq	MW(n=6, 7)	33	0.304196
FigureS10E	Intromission_event	Mann-Whitney U rank test	Post_ejaculatory_eYFP vs Post_ejaculatory_hM3Dq	MW(n=6, 8)	45.5	0.0165145
FigureS10F	Receptive_score	Mann-Whitney U rank test	Post_ejaculatory_eYFP vs Appetitive_hM3Dq	MW(n=6, 7)	20	1
FigureS10F	Receptive_score	Mann-Whitney U rank test	Post_ejaculatory_eYFP vs Consummatory_hM3Dq	MW(n=6, 7)	34.5	0.188784
FigureS10F	Receptive_score	Mann-Whitney U rank test	Post_ejaculatory_eYFP vs Post_ejaculatory_hM3Dq	MW(n=6, 8)	42	0.062566
FigureS10H	Zone_Cumulative Duration	Mann-Whitney U rank test	Post_ejaculatory_eYFP vs Appetitive_hM3Dq	MW(n=12, 14)	34	0.22028
FigureS10H	Zone_Cumulative Duration	Mann-Whitney U rank test	Post_ejaculatory_eYFP vs Post_ejaculatory_hM3Dq	MW(n=12, 16)	26	1
FigureS10H	Zone_Cumulative Duration	Mann-Whitney U rank test	Appetitive_hM3Dq vs Post_ejaculatory_hM3Dq	MW(n=14, 16)	26	1
FigureS10I	Zone_Frequency	Mann-Whitney U rank test	Post_ejaculatory_eYFP vs Appetitive_hM3Dq	MW(n=12, 14)	28	1
FigureS10I	Zone_Frequency	Mann-Whitney U rank test	Post_ejaculatory_eYFP vs Post_ejaculatory_hM3Dq	MW(n=12, 16)	19	1
FigureS10I	Zone_Frequency	Mann-Whitney U rank test	Appetitive_hM3Dq vs Post_ejaculatory_hM3Dq	MW(n=14, 16)	19	1
FigureS10J	Velocity	Mann-Whitney U rank test	Post_ejaculatory_eYFP vs Appetitive_hM3Dq	MW(n=12, 14)	16	1
FigureS10J	Velocity	Mann-Whitney U rank test	Post_ejaculatory_eYFP vs Post_ejaculatory_hM3Dq	MW(n=12, 16)	33	0.847153
FigureS10J	Velocity	Mann-Whitney U rank test	Appetitive_hM3Dq vs Post_ejaculatory_hM3Dq	MW(n=14, 16)	33	0.847153
FigureS10L	Number_of_Retrieval	Two-way Wilcoxon signed-rank test	eYFP; Saline vs CNO	W(n=8)	0	1
FigureS10L	Number_of_Retrieval	Two-way Wilcoxon signed-rank test	hM3Dq; Saline vs CNO	W(n=8)	0	1
FigureS10M	Number_of_Nest	Two-way Wilcoxon signed-rank test	eYFP; Saline vs CNO	W(n=8)	0	1
FigureS10M	Number_of_Nest	Two-way Wilcoxon signed-rank test	hM3Dq; Saline vs CNO	W(n=8)	0	0.634621
FigureS10N	Number_of_Grooming	Two-way Wilcoxon signed-rank test	eYFP; Saline vs CNO	W(n=8)	9.5	1
FigureS10N	Number_of_Grooming	Two-way Wilcoxon signed-rank test	hM3Dq; Saline vs CNO	W(n=8)	13.5	1
FigureS10O	Number_of_Sniff	Two-way Wilcoxon signed-rank test	eYFP; Saline vs CNO	W(n=8)	6.5	1
FigureS10O	Number_of_Sniff	Two-way Wilcoxon signed-rank test	hM3Dq; Saline vs CNO	W(n=8)	8	0.390625
FigureS11E	Number_of_zone_transition_per_10min	Two-way Wilcoxon signed-rank test	Post_ejaculatory_eYFP; Saline vs CNO	W(n=6)	4	0.4375
FigureS11E	Number_of_zone_transition_per_10min	Two-way Wilcoxon signed-rank test	Post_ejaculatory_hM4Di; Saline vs CNO	W(n=8)	15	1
FigureS11F	Average_Isolation_zone_duration	Two-way Wilcoxon signed-rank test	Post_ejaculatory_eYFP; Saline vs CNO	W(n=6)	9	1
FigureS11F	Average_Isolation_zone_duration	Two-way Wilcoxon signed-rank test	Post_ejaculatory_hM4Di; Saline vs CNO	W(n=8)	17	1
FigureS11G	Average_Interaction_zone_duration	Two-way Wilcoxon signed-rank test	Post_ejaculatory_eYFP; Saline vs CNO	W(n=6)	3	0.3125
FigureS11G	Average_Interaction_zone_duration	Two-way Wilcoxon signed-rank test	Post_ejaculatory_hM4Di; Saline vs CNO	W(n=8)	5	0.15625
FigureS11H	Sniff_event	Two-way Wilcoxon signed-rank test	Post_ejaculatory_eYFP; Saline vs CNO	W(n=6)	1	0.159232
FigureS11H	Sniff_event	Two-way Wilcoxon signed-rank test	Post_ejaculatory_hM4Di; Saline vs CNO	W(n=8)	10	0.991736
FigureS11I	Mount_event	Two-way Wilcoxon signed-rank test	Post_ejaculatory_eYFP; Saline vs CNO	W(n=6)	1	0.288254
FigureS11I	Mount_event	Two-way Wilcoxon signed-rank test	Post_ejaculatory_hM4Di; Saline vs CNO	W(n=8)	18	1
FigureS11J	Grooming_event	Two-way Wilcoxon signed-rank test	Post_ejaculatory_eYFP; Saline vs CNO	W(n=6)	1	0.288254
FigureS11J	Grooming_event	Two-way Wilcoxon signed-rank test	Post_ejaculatory_hM4Di; Saline vs CNO	W(n=8)	14.5	1
FigureS11K	Intromission_event	Two-way Wilcoxon signed-rank test	Post_ejaculatory_eYFP; Saline vs CNO	W(n=6)	3	0.445602
FigureS11K	Intromission_event	Two-way Wilcoxon signed-rank test	Post_ejaculatory_hM4Di; Saline vs CNO	W(n=8)	16	1
FigureS11L	Receptive_score	Two-way Wilcoxon signed-rank test	Post_ejaculatory_eYFP; Saline vs CNO	W(n=6)	6	1
FigureS11L	Receptive_score	Two-way Wilcoxon signed-rank test	Post_ejaculatory_hM4Di; Saline vs CNO	W(n=8)	4	0.109375
FigureS11N	Sniff_event	Mann-Whitney U rank test	eYFP vs hM4Di	MW(n=6, 8)	20.5	0.696948
FigureS11O	Mount_event	Mann-Whitney U rank test	eYFP vs hM4Di	MW(n=6, 8)	17	0.40035
FigureS11P	Intromission_event	Mann-Whitney U rank test	eYFP vs hM4Di	MW(n=6, 8)	1.5	0.00446471
FigureS11Q	Receptive_score	Mann-Whitney U rank test	eYFP vs hM4Di	MW(n=6, 8)	6	0.01998
FigureS5D	Proportion of Fos positive_cells	t-test with BH correction	BST; Appetitive vs Post_ejaculatory	t(8)	-0.369372	1
FigureS5D	Proportion of Fos positive_cells	t-test with BH correction	LPO; Appetitive vs Post_ejaculatory	t(8)	-0.309368	1
FigureS5D	Proportion of Fos positive_cells	t-test with BH correction	MPA; Appetitive vs Post_ejaculatory	t(8)	-1.84129	0.514207
FigureS5D	Proportion of Fos positive_cells	t-test with BH correction	MPN; Appetitive vs Post_ejaculatory	t(8)	-4.27088	0.0136047
FigureS5D	Proportion of Fos positive_cells	t-test with BH correction	VLPO; Appetitive vs Post_ejaculatory	t(8)	-0.175077	1
FigureS5I	Proportion of Fos positive_cells	t-test with BH correction	Vglut2; Appetitive vs Post_ejaculatory	t(8)	-3.3885	0.0190421
FigureS5I	Proportion of Fos positive_cells	t-test with BH correction	Vgat; Appetitive vs Post_ejaculatory	t(8)	-3.53614	0.0153258
FigureS5J	Proportion of Fos positive_cells	t-test with BH correction	Vgat+ Calcr+; Appetitive vs Post_ejaculatory	t(8)	-3.66459	0.0317949
FigureS5J	Proportion of Fos positive_cells	t-test with BH correction	Vgat+ Esr1+; Appetitive vs Post_ejaculatory	t(8)	-3.14418	0.0685917
FigureS5J	Proportion of Fos positive_cells	t-test with BH correction	Vgat+ Gal+; Appetitive vs Post_ejaculatory	t(8)	-4.08961	0.0174374
FigureS5J	Proportion of Fos positive_cells	t-test with BH correction	Vgat+ Nts+; Appetitive vs Post_ejaculatory	t(8)	-2.63821	0.148981
FigureS5J	Proportion of Fos positive_cells	t-test with BH correction	Vgat+ Prlr+; Appetitive vs Post_ejaculatory	t(8)	-3.94875	0.0212174
FigureS5J	Proportion of Fos positive_cells	t-test with BH correction	Vglut2+ Calcr+; Appetitive vs Post_ejaculatory	t(8)	-3.94875	0.0145601
FigureS5J	Proportion of Fos positive_cells	t-test with BH correction	Vglut2+ Esr1+; Appetitive vs Post_ejaculatory	t(8)	-3.94875	0.822279
FigureS5J	Proportion of Fos positive_cells	t-test with BH correction	Vglut2+ Gal+; Appetitive vs Post_ejaculatory	t(8)	-3.94875	0.12988
FigureS5J	Proportion of Fos positive_cells	t-test with BH correction	Vglut2+ Nts+; Appetitive vs Post_ejaculatory	t(8)	-3.94875	0.195111
FigureS5J	Proportion of Fos positive_cells	t-test with BH correction	Vglut2+ Prlr+; Appetitive vs Post_ejaculatory	t(8)	-3.94875	0.10378
FigureS5M	Proportion of Fos positive_cells	t-test with BH correction	Cluster Vglut2+; Appetitive vs Post_ejaculatory	t(8)	-4.16308	0.0189111
FigureS5M	Proportion of Fos positive_cells	t-test with BH correction	Cluster Vgat+; Appetitive vs Post_ejaculatory	t(8)	-5.90177	0.00216614
FigureS5M	Proportion of Fos positive_cells	t-test with BH correction	Cluster Gal+; Appetitive vs Post_ejaculatory	t(8)	-3.92081	0.0264802
FigureS5M	Proportion of Fos positive_cells	t-test with BH correction	Cluster Calcr+; Appetitive vs Post_ejaculatory	t(8)	-1.54377	0.999328
FigureS5M	Proportion of Fos positive_cells	t-test with BH correction	Cluster Nts+; Appetitive vs Post_ejaculatory	t(8)	-2.1595	0.377029
FigureS5M	Proportion of Fos positive_cells	t-test with BH correction	Cluster N.A.; Appetitive vs Post_ejaculatory	t(8)	-1.82543	0.632231
