# Supplementary material for: Post-ejaculatory inhibition of female sexual drive via heterogeneous neuronal ensembles in the medial preoptic area
Source: eLife. 2025 Mar 5;12:RP91765. doi: 10.7554/eLife.91765 (PMC11882143; doi:10.7554/eLife.91765)
Supplement: Supplementary file 2. — One-way ANOVA test with Benjamini/Hochberg correction (FDR = 0.05). [file elife-91765-supp2.xlsx]

## Sheet: Sheet1
Name	acronym	pvalue	Fvalue	qvalue	ANOVA_sig_fdr_corrected	Post-ejaculatory vs Appetitive	Post-ejaculatory vs Consummatory	Appetitive vs Consummatory
Cortical plate	CTXpl	0.0549756	3.82014	0.061084	FALSE	0.0455865	0.3302	0.401076
Cortical subplate	CTXsp	0.051169	3.94254	0.061084	FALSE	0.0418342	0.46932	0.263034
Striatum	STR	0.0264974	5.14273	0.0441623	TRUE	0.0212783	0.244212	0.292389
Pallidum	PAL	0.0162586	6.13109	0.0410657	TRUE	0.0126515	0.24737	0.185844
Thalamus	TH	0.0205329	5.64782	0.0410657	TRUE	0.0162334	0.233747	0.243587
Hypothalamus	HY	0.0199901	5.70225	0.0410657	TRUE	0.0166586	0.51044	0.103517
Midbrain, sensory related	MBsen	0.0477922	4.06048	0.061084	FALSE	0.0427554	0.209241	0.54541
Midbrain, motor related	MBmot	0.0200527	5.69589	0.0410657	TRUE	0.0205222	0.0815001	0.623434
Midbrain, behavioral state related	MBsta	0.0695188	3.43078	0.0695188	FALSE	0.05881	0.342072	0.4663
Pons	P	0.0117513	6.83833	0.0410657	TRUE	0.00920122	0.162089	0.209363
