# Supplementary material for: Post-ejaculatory inhibition of female sexual drive via heterogeneous neuronal ensembles in the medial preoptic area
Source: eLife. 2025 Mar 5;12:RP91765. doi: 10.7554/eLife.91765 (PMC11882143; doi:10.7554/eLife.91765)
Supplement: Supplementary file 3. — One-way ANOVA test with Benjamini/Hochberg correction (FDR = 0.10) followed by post-hoc Tukey’s HSD test (FWER = 0.05). [file elife-91765-supp3.xlsx]

## Sheet: Sheet1
Name	acronym	pvalue	Fvalue	qvalue	ANOVA_sig_fdr_corrected	Post-ejaculatory vs Appetitive	Post-ejaculatory vs Consummatory	Appetitive vs Consummatory
Retroethmoid nucleus	REth	0.000355991	17.801	0.0669263	TRUE	0.000253825	0.0325342	0.0219227
Visual cortex	V	0.0366214	4.53464	0.090722	TRUE	0.0408077	0.917406	0.0768994
Cingulate cortex, area 29 and 30 (retrosplenial cortex)	A29-30 (RS)	0.0427761	4.25518	0.090722	TRUE	0.0346422	0.432145	0.246815
Perihinal cortex	PRh	0.0284474	5.00621	0.090722	TRUE	0.0256863	0.679337	0.100254
Ectorhinal cortex	Ect	0.0379122	4.47164	0.090722	TRUE	0.0319126	0.567581	0.162894
Main olfactory bulb	MOB	0.0427396	4.25669	0.090722	TRUE	0.0536805	0.0958028	0.882723
Anterior olfactory area	AO	0.0186255	5.8472	0.090722	TRUE	0.0200416	0.0695206	0.668701
Taenia tecta	TT	0.0107906	7.03115	0.090722	TRUE	0.00890001	0.106929	0.290282
Cingulate cortex, area 25 (dorsal peduncular cortex)	A25 (DP)	0.022674	5.44857	0.090722	TRUE	0.0180597	0.233339	0.266646
Piriform cortex	PIR	0.0443959	4.18948	0.090722	TRUE	0.0362413	0.474608	0.229999
Nucleus of the lateral olfactory tract	LOT	0.0330856	4.72161	0.090722	TRUE	0.0267098	0.438271	0.194161
cortical amygdaloid nucleus	CO	0.0358622	4.57293	0.090722	TRUE	0.0301791	0.564298	0.156137
Rostral amygdalopiriform area	RAPir	0.0219953	5.50924	0.090722	TRUE	0.0195273	0.633494	0.0869332
Amygdalopiriform transition area	Apir	0.0192928	5.77481	0.090722	TRUE	0.0178605	0.686355	0.0693496
Hippocampal region	HIP	0.0063004	8.31903	0.090722	TRUE	0.00721511	0.0279062	0.613545
Retrohippocampal region	RHP	0.0203697	5.664	0.090722	TRUE	0.0160488	0.346729	0.161367
Ventral claustrum	VCl	0.0392336	4.40972	0.090722	TRUE	0.0371091	0.768178	0.112383
Retroendopiriform nucleus	REn	0.0331883	4.71585	0.090722	TRUE	0.0298559	0.684829	0.113954
Basolateral amygdaloid nucleus, anterior part	BLA	0.0210566	5.59689	0.090722	TRUE	0.0286552	0.984688	0.0375795
Basolateral amygdaloid nucleus, posterior part	BLP	0.0325417	4.75246	0.090722	TRUE	0.0320093	0.801511	0.0889492
Basolateral amygdaloid nucleus, ventral part	BLV	0.0437445	4.21555	0.090722	TRUE	0.0353731	0.37064	0.295813
Basomedial amygdaloid nucleus, anterior part	BMA	0.0321539	4.77483	0.090722	TRUE	0.0267014	0.52713	0.153572
Basomedial amygdaloid nucleus, posterior part	BMP	0.0424746	4.26773	0.090722	TRUE	0.039585	0.75437	0.123926
Amygdalohippocampal area, anterolateral part	AHiAL	0.041337	4.31606	0.090722	TRUE	0.0351941	0.230973	0.447002
Amygdalohippocampal area, posteromedial part	AHiPM	0.0441165	4.20061	0.090722	TRUE	0.0358665	0.453667	0.240423
Accumbens nucleus	Acb	0.02767	5.05926	0.090722	TRUE	0.0221739	0.412684	0.176803
Olfactory tubercle	Tu	0.0325089	4.75434	0.090722	TRUE	0.0267335	0.501353	0.164365
Lateral septal nucleus	LS	0.0143038	6.40515	0.090722	TRUE	0.0110995	0.287531	0.141275
Septofimbrial nucleus	SFi	0.033438	4.70194	0.090722	TRUE	0.0403667	0.0854948	0.833045
Central amygdalar nucleus	Ce	0.0246343	5.28475	0.090722	TRUE	0.0195586	0.262411	0.255331
Intercalated nuclei of the amygdala	I	0.0175582	5.96959	0.090722	TRUE	0.0224261	0.958621	0.0351683
Medial amygdaloid nucleus	Me	0.032444	4.75807	0.090722	TRUE	0.027006	0.219451	0.385102
Substantia innominata, basal part	SIB	0.0150772	6.29172	0.090722	TRUE	0.017389	0.894538	0.0361984
Extension of the amygdala	EA	0.0215842	5.54706	0.090722	TRUE	0.0172402	0.217673	0.273345
Medial septal complex	MSC	0.00988944	7.23142	0.090722	TRUE	0.00759232	0.256392	0.111705
Triangular septal nucleus	TS	0.0294498	4.94026	0.090722	TRUE	0.0375116	0.0719978	0.860286
Bed nuclei of the stria terminalis	ST	0.0135923	6.51611	0.090722	TRUE	0.0105119	0.229891	0.169297
Posterior intralaminar thalamic nucleus	PIL	0.00400416	9.50617	0.090722	TRUE	0.00299222	0.16788	0.0691146
Peripeduncular nucleus	PP	0.0232077	5.40236	0.090722	TRUE	0.0184382	0.381002	0.164419
Subbrachial nucleus	SubB	0.0350866	4.61306	0.090722	TRUE	0.0282719	0.301153	0.30267
Lateral group of the dorsal thalamus	LAT	0.019966	5.70471	0.090722	TRUE	0.0164541	0.165249	0.333142
Anterior group of the dorsal thalamus	ATN	0.0287522	4.98587	0.090722	TRUE	0.0230103	0.27251	0.281645
Reticular nucleus (prethalamus)	Rt	0.0387726	4.43103	0.090722	TRUE	0.0587659	0.070442	0.966109
Geniculate group, ventral thalamus	GENv	0.00886417	7.48732	0.090722	TRUE	0.00741417	0.463374	0.0536621
Accessory supraoptic group	ASO	0.0392119	4.41071	0.090722	TRUE	0.116139	0.751186	0.0366129
Paraventricular hypothalamic nucleus, anterior part	PVH	0.0268291	5.11869	0.090722	TRUE	0.0212627	0.344956	0.208226
Arcuate hypothalamic nucleus	Arc	0.0126293	6.67774	0.090722	TRUE	0.0139927	0.853089	0.0336451
Dorsal hypothalamic area	DA	0.0289031	4.97589	0.090722	TRUE	0.0277732	0.765756	0.0858051
Dorsomedial hypothalamic nucleus	DM	0.0153094	6.25899	0.090722	TRUE	0.0169692	0.865146	0.0391856
Medial preoptic area	MPA	0.0271022	5.09915	0.090722	TRUE	0.0215007	0.353848	0.204581
Parastrial nucleus	PS	0.00897419	7.45822	0.090722	TRUE	0.0722264	0.356095	0.00711547
Ventrolateral preoptic nucleus	VLPO	0.0314117	4.81855	0.090722	TRUE	0.0698753	0.899788	0.0345201
Anterior hypothalamic nucleus	AHN	0.0360559	4.56307	0.090722	TRUE	0.0295018	0.487818	0.185911
Mammillary body	MBO	0.0102726	7.14373	0.090722	TRUE	0.011876	0.875135	0.0264915
Medial preoptic nucleus	MPO	0.0159029	6.17797	0.090722	TRUE	0.0136277	0.117565	0.376194
Paraventricular hypothalamic nucleus, descending division	PVHd	0.00372684	9.70327	0.090722	TRUE	0.00351109	0.0303445	0.355148
Posterior hypothalamic area	PHA	0.00457066	9.14944	0.090722	TRUE	0.00528585	0.826611	0.013658
Lateral hypothalamic area	LH	0.0270217	5.10488	0.090722	TRUE	0.0231812	0.588043	0.115161
Lateral preoptic area	LPO	0.0123196	6.73283	0.090722	TRUE	0.0143728	0.891889	0.0302168
Retrochiasmatic area	RCh	0.0183852	5.87402	0.090722	TRUE	0.0212262	0.905664	0.0423234
Subincertal nucleus	SubI	0.0342281	4.65871	0.090722	TRUE	0.0310461	0.160626	0.53205
Ventral linear nucleus of the thalamus	VLi	0.0289238	4.97453	0.090722	TRUE	0.0273481	0.745525	0.0893476
Zona incerta	ZI	0.0131989	6.58046	0.090722	TRUE	0.0119385	0.0850335	0.431084
Dorsal cortex of the inferior colliculus	DCIC	0.0373149	4.50047	0.090722	TRUE	0.0309974	0.244977	0.389611
External cortex of the inferior colliculus	ECIC	0.0376579	4.48385	0.090722	TRUE	0.0320908	0.215988	0.441259
Ventral tegmental area, rostral part	VTAR	0.026728	5.12598	0.090722	TRUE	0.0213964	0.409287	0.172928
Retrorubral field	RRF	0.0170412	6.03209	0.090722	TRUE	0.0137288	0.423234	0.110317
Pleoglial periaqueductal gray	PlPAG	0.00924992	7.38712	0.090722	TRUE	0.0859694	0.310229	0.00720213
Ventrolateral periaqueductal gray	VLPAG	0.0181736	5.89798	0.090722	TRUE	0.0158008	0.121621	0.408941
Interstitial nucleus of Cajal, shell region	InCSh	0.0356649	4.58304	0.090722	TRUE	0.0447102	0.0845068	0.866049
Anterior pretectal nucleus	APT	0.0382801	4.45415	0.090722	TRUE	0.0582879	0.0694214	0.966999
Retrocommissural nucleus	ReC	0.0166899	6.07585	0.090722	TRUE	0.013347	0.176556	0.266405
Nucleus of the optic tract	OT	0.0441628	4.19876	0.090722	TRUE	0.0418788	0.779848	0.122025
Precuneiform area	PrCnF	0.0104029	7.11479	0.090722	TRUE	0.0180345	0.0222402	0.950802
Red nucleus, parvicellular part	RPC	0.0370986	4.51104	0.090722	TRUE	0.0299651	0.433962	0.217097
Red nucleus, magnocellular part	RMC	0.0399427	4.37749	0.090722	TRUE	0.0446443	0.110008	0.787078
Trochlear nucleus shell region	4Sh	0.0367879	4.52637	0.090722	TRUE	0.042639	0.0976394	0.809943
Subpeduncular tegmental nucleus	SPTg	0.0425196	4.26585	0.090722	TRUE	0.046193	0.120885	0.767516
Paralemniscal nucleus	PL	0.0414441	4.31145	0.090722	TRUE	0.0335415	0.432915	0.239701
Parabrachial nucleus	PB	0.0284429	5.00651	0.090722	TRUE	0.0237504	0.196923	0.38206
Superior olivary complex	SOC	0.0282197	5.02157	0.090722	TRUE	0.0232249	0.212538	0.353135
Barrington's nucleus	Bar	0.0373682	4.49788	0.090722	TRUE	0.0302702	0.298984	0.321628
Central gray	CG	0.0170241	6.0342	0.090722	TRUE	0.0144452	0.128423	0.367644
Pontine nuclei	Pn	0.00742515	7.91242	0.090722	TRUE	0.00566619	0.240865	0.0899104
Dorsomedial tegmental area	DMTg	0.034363	4.65144	0.090722	TRUE	0.0436389	0.0807619	0.87152
Superior salivatory nucleus	SuS	0.0196554	5.7367	0.090722	TRUE	0.0157954	0.192237	0.284017
Supratrigeminal nucleus	Su5	0.0389424	4.42315	0.090722	TRUE	0.03405	0.198508	0.488796
Motor trigeminal nucleus	5N	0.0224405	5.4692	0.090722	TRUE	0.0214978	0.103428	0.558901
Peritrigeminal zone	P5	0.0361682	4.55739	0.090722	TRUE	0.0327503	0.167486	0.535314
Locus coeruleus	LC	0.0316353	4.80525	0.090722	TRUE	0.0257186	0.251944	0.330365
Medial paralemniscial nucleus	MPL	0.0242286	5.31736	0.090722	TRUE	0.0387756	0.998342	0.0354844
Perilemniscal nucleus, ventral part	PLV	0.013131	6.59178	0.090722	TRUE	0.0120372	0.0812058	0.447395
Midline group of the dorsal thalamus	MTN	0.0449944	4.16591	0.0909565	TRUE	0.0368975	0.309301	0.363208
Intralaminar nuclei of the dorsal thalamus	ILM	0.0467071	4.10048	0.0924309	TRUE	0.0406393	0.64993	0.165416
Principal sensory trigeminal nucleus	Pr5	0.0462824	4.11644	0.0924309	TRUE	0.0397649	0.23912	0.473336
Perifornical nucleus	PeF	0.048129	4.04828	0.0936004	TRUE	0.0459743	0.794906	0.12782
Supragenual nucleus	SGe	0.0482938	4.04235	0.0936004	TRUE	0.054303	0.12399	0.811659
Dorsal raphÃˆ nucleus	DR	0.0491431	4.01215	0.0942744	TRUE	0.0408391	0.540752	0.21651
Lateral periaqueductal gray	LPAG	0.0510278	3.94728	0.0959322	TRUE	0.0638991	0.108988	0.895471
Reticulotegmental nucleus of the pons	RtTg	0.050704	3.95822	0.0959322	TRUE	0.0468795	0.755806	0.144524
Granular insular cortex	GI	0.056014	3.78849	0.0960257	TRUE	0.0460715	0.49435	0.268193
Temporal association cortex	TeA	0.054592	3.83202	0.0960257	TRUE	0.0464289	0.608175	0.206033
Dorsal claustrum	DCl	0.0571643	3.75422	0.0960257	TRUE	0.0485007	0.293054	0.463123
Lateral amygdaloid nucleus, ventrolateral part	LaVL	0.0576364	3.7404	0.0960257	TRUE	0.0566048	0.838687	0.137187
Caudate Putamen	CP	0.0569693	3.75997	0.0960257	TRUE	0.0575397	0.170032	0.72465
Septohypothalamic nucleus	SHy	0.0577176	3.73803	0.0960257	TRUE	0.0546054	0.795479	0.149816
Anterior amygdaloid area	AA	0.056716	3.76748	0.0960257	TRUE	0.0474506	0.563293	0.23348
Anteroventral periventricular nucleus	AVPe	0.0529369	3.8844	0.0960257	TRUE	0.0432677	0.460921	0.276115
Posterodorsal preoptic nucleus	PDPO	0.0558877	3.7923	0.0960257	TRUE	0.0478862	0.62699	0.20245
Paraterete nucleus	PTe	0.0519077	3.91796	0.0960257	TRUE	0.0428315	0.514612	0.240262
Superior colliculus, sensory related	SCs	0.0532046	3.8758	0.0960257	TRUE	0.0435587	0.367623	0.35124
Superior colliculus, motor related	SCm	0.0555818	3.80158	0.0960257	TRUE	0.067907	0.119836	0.887023
Substantia nigra, compact part, dorsal tier	SNCD	0.0543326	3.8401	0.0960257	TRUE	0.0525598	0.181975	0.668541
Interstitial nucleus of the posterior limb of the anterior commissure	IPAC	0.0588755	3.70473	0.097093	TRUE	0.0482754	0.408003	0.343282
Cingulate cortex, area 24a (infralimbic)	A24a (IL)	0.0601026	3.67027	0.0974077	TRUE	0.0527479	0.260387	0.53505
Ventral group thalamic nucleus	VENT	0.0598054	3.67854	0.0974077	TRUE	0.0658526	0.148609	0.815213
Dorsal endopiriform nucleus	DEn	0.0607827	3.65153	0.097668	TRUE	0.0506625	0.3429	0.418923
Frontal association cortex	FrA	0.0620532	3.61717	0.0980337	TRUE	0.0529218	0.301815	0.480132
Dysgranular insular cortex	DI	0.0616991	3.62666	0.0980337	TRUE	0.051686	0.56758	0.24863
Medial group of the dorsal thalamus	MED	0.0629969	3.59219	0.0986951	TRUE	0.0603251	0.816222	0.155208
Septohippocampal nucleus	SHi	0.0643596	3.55688	0.0999967	TRUE	0.0529821	0.46813	0.319727
Central nucleus of the inferior colliculus	CIC	0.06587	3.51876	0.101505	FALSE	0.0546968	0.379301	0.404626
Amygdalohippocampal area, posterolateral	AHiPL	0.0670806	3.48894	0.10253	FALSE	0.0622917	0.780944	0.175729
Laterodorsal tegmental nucleus	LDT	0.0689341	3.44451	0.104513	FALSE	0.0598178	0.298515	0.524946
Basal nucleus (Meynert)	B	0.0723644	3.36588	0.106285	FALSE	0.0776508	0.176679	0.811708
Ethmoid thalamic nucleus	Eth	0.0715455	3.38424	0.106285	FALSE	0.0979776	0.123289	0.962178
Epithalamus	EPI	0.0720274	3.37341	0.106285	FALSE	0.078916	0.169762	0.829695
Retroparafascicular nucleus	RPF	0.0719585	3.37495	0.106285	FALSE	0.0761897	0.917894	0.139993
Cingulate cortex, area 32 (Prelimbic cortex)	A32 (PrL)	0.0752774	3.30249	0.108032	FALSE	0.0625189	0.507198	0.333457
Lateral amygdaloid nucleus, ventromedial part	LaVM	0.0741825	3.32597	0.108032	FALSE	0.0747515	0.879924	0.156856
Subfornical organ	SFO	0.0750984	3.3063	0.108032	FALSE	0.0935833	0.143563	0.922882
Medial tuberal nucleus	MTu	0.0763068	3.28078	0.108679	FALSE	0.0643575	0.58862	0.284836
Lateral amygdaloid nucleus, dorsolateral part	LaDL	0.077712	3.25169	0.109849	FALSE	0.064562	0.45796	0.381501
Oculomotor nucleus, parvicellular part	3PC	0.0797676	3.21025	0.111913	FALSE	0.0693164	0.326901	0.539029
Pontine reticular nucleus	PRNr	0.0803817	3.19811	0.111939	FALSE	0.0965004	0.158384	0.906743
Geniculate group of the thalamus	GENd	0.0825534	3.15605	0.114118	FALSE	0.0721334	0.326468	0.553328
Nucleus of stria medullaris	SM	0.0859494	3.09284	0.115418	FALSE	0.0826764	0.841778	0.193017
Suprachiasmatic nucleus	SCh	0.0854857	3.10129	0.115418	FALSE	0.0713582	0.476259	0.395164
Parainterfascicular nucleus of the VTA	PIF	0.0847293	3.11521	0.115418	FALSE	0.0920295	0.942369	0.151691
Substantia nigra, compact part, medial tier	SNCM	0.0841546	3.12587	0.115418	FALSE	0.0704002	0.442001	0.4214
parietal association cortex	PtA	0.0886794	3.04413	0.115776	FALSE	0.0743061	0.538819	0.356465
Premamillary nucleus, ventral part	PMV	0.0873813	3.06707	0.115776	FALSE	0.0833083	0.832373	0.199514
Parasubthalamic nucleus	PSTh	0.0883582	3.04977	0.115776	FALSE	0.118834	0.999986	0.119754
Pre-Edinger-Westphal nucleus	PrEW	0.0885046	3.04719	0.115776	FALSE	0.0831823	0.268149	0.683557
motor cortex	M	0.0939445	2.95499	0.12	FALSE	0.0798288	0.416172	0.486728
Ventromedial hypothalamic nucleus	VMH	0.0938502	2.95654	0.12	FALSE	0.111561	0.98417	0.144242
Olivary pretectal nucleus	OPT	0.0951065	2.93612	0.12	FALSE	0.0828101	0.685217	0.283843
Dorsal tegmental nucleus	DTg	0.0945745	2.94473	0.12	FALSE	0.0811205	0.392727	0.51681
Pontine reticular nucleus, caudal part	PnC	0.0948002	2.94107	0.12	FALSE	0.0895154	0.276645	0.697455
Medial pretectal area	MPT	0.0987269	2.87901	0.123738	FALSE	0.0859899	0.373134	0.558905
Agranular insular cortex	AI	0.102792	2.81776	0.124677	FALSE	0.0867206	0.55228	0.390435
Bed nucleus of the accessory olfactory tract	BAOT	0.10272	2.81882	0.124677	FALSE	0.106118	0.919079	0.190325
Vascular organ of the lamina terminalis	VOLT	0.100755	2.84809	0.124677	FALSE	0.0972779	0.855949	0.214925
Ventromedidal preoptic nucleus	VMPO	0.101852	2.83167	0.124677	FALSE	0.0949059	0.812437	0.236466
prosomere 1 periaqueductal gray	p1PAG	0.101054	2.84358	0.124677	FALSE	0.0868085	0.647694	0.320273
Subthalamic nucleus	STh	0.104105	2.79858	0.12546	FALSE	0.0925106	0.734306	0.279185
Cingulate cortex	A24 (Cg)	0.105093	2.78435	0.125606	FALSE	0.0889119	0.482795	0.457779
Commissural nucleus of the inferior colliculus	Com	0.105563	2.77763	0.125606	FALSE	0.10176	0.281117	0.736817
Supraoptic nucleus	SO	0.114217	2.65989	0.135049	FALSE	0.10756	0.313331	0.713401
Somatosensory cortex	S	0.119083	2.59823	0.139922	FALSE	0.102122	0.469465	0.517144
Auditory cortex	Au	0.120289	2.5834	0.139935	FALSE	0.107548	0.752983	0.304001
Posterior pretectal nucleus	PPT	0.120582	2.57983	0.139935	FALSE	0.106972	0.736554	0.313953
Parabranchial pigmented nucleus of the VTA	PBP	0.121442	2.56939	0.140069	FALSE	0.108503	0.383968	0.630091
Median preoptic nucleus	MnPO	0.122459	2.55717	0.140379	FALSE	0.127297	0.263584	0.836538
Accessory olfactory bulb	AOB	0.130266	2.46714	0.148424	FALSE	0.114831	0.425218	0.604879
Sphenoid nucleus	Sph	0.132163	2.44623	0.149678	FALSE	0.21597	0.161856	0.996806
Subparafascicular thalamic nucleus	SPF	0.133453	2.43221	0.150234	FALSE	0.14464	0.961127	0.213345
Orbital cortex	O	0.134991	2.4157	0.151061	FALSE	0.115657	0.601335	0.440025
Intermediate endopiriform claustrum	IEn	0.137951	2.38454	0.153461	FALSE	0.148579	0.267356	0.879367
Paraventricular hypothalamic nucleus, ventral part	PaV	0.139754	2.36595	0.154551	FALSE	0.120595	0.646626	0.416205
Periventricular hypothalamic nucleus	Pe	0.141607	2.34714	0.155684	FALSE	0.121539	0.591758	0.464638
Ventral endopiriform nucleus	VEn	0.150824	2.25768	0.164854	FALSE	0.129912	0.594326	0.48516
Nucleus raphÃˆ	NR	0.162362	2.1544	0.17644	FALSE	0.150044	0.411565	0.719287
Dorsolateral periaqueductal gray	DLPAG	0.163837	2.14182	0.177019	FALSE	0.271874	0.187814	0.98866
Nucleus of the posterior commissure	PCom	0.166312	2.12102	0.178667	FALSE	0.199377	0.2588	0.959807
Bed nucleus of the anterior commissure	BAC	0.171864	2.07565	0.183582	FALSE	0.158929	0.830324	0.35311
Interfascicular nucleus	IF	0.200366	1.86722	0.212818	FALSE	0.177275	0.567493	0.624907
Cell bridges of the ventral striatum	CB	0.230045	1.6845	0.242969	FALSE	0.203718	0.696772	0.557722
Pontine raphÃˆ nucleus	PnR	0.255202	1.55021	0.268033	FALSE	0.229118	0.623905	0.673087
Subparaventricular zone of the hypothalamus	SPa	0.280109	1.43184	0.292559	FALSE	0.271155	0.916259	0.444134
Paratrochlear nucleus	Pa4	0.291161	1.38324	0.302421	FALSE	0.44284	0.307031	0.978952
Dorsomedial periaqueductal gray	DMPAG	0.295743	1.36373	0.305493	FALSE	0.40551	0.334502	0.99771
Premamillary nucleus, dorsal part	PMD	0.299676	1.34726	0.307864	FALSE	0.292524	0.928328	0.457292
Rostral linear nucleus (midbrain)	RLi	0.383597	1.04669	0.391936	FALSE	0.382331	0.576364	0.91004
Interpeduncular nucleus	IP	0.425732	0.923806	0.432636	FALSE	0.639869	0.415635	0.944832
Paranigral nucleus of the VTA	PN	0.458764	0.837119	0.463697	FALSE	0.501243	0.558909	0.985812
Scaphoid thalamic nucleus	Sc	0.46355	0.825174	0.466028	FALSE	0.443989	0.923108	0.650618
Caudal linear nucleus of the raphÃˆ	CLi	0.557792	0.615876	0.557792	FALSE	0.639297	0.992967	0.57604
